# Supplementary material
Source: PubMed Central journal article supplement (PMC3276290)
Supplement: supp_ddr449_ddr449supp.pdf [file supp_ddr449_ddr449supp.pdf]

Table S1 Statistical significance value of differences in PC0 between genotypes at 2- and 20-DAE age. n≥20. Significance level was established by one way ANOVA post-hoc Scheffe test.

| Day 1  |                                      |                   |                   |                          |                   |                                     |                    |                 |                                      |                                   |
|--------|--------------------------------------|-------------------|-------------------|--------------------------|-------------------|-------------------------------------|--------------------|-----------------|--------------------------------------|-----------------------------------|
|        | PC1                                  | yw                | UAS-Tau           | UAS-Tau <sup>R406W</sup> | UAS-Tau, nmnat+/- | UAS-Tau <sup>R406W</sup> , nmnat+/- | UAS-Tau, UAS-NMNAT | UAS-Tau, UAS-WR | UAS-Tau <sup>R406W</sup> , UAS-NMNAT | UAS-Tau <sup>R406W</sup> , UAS-WR |
| Day 20 | yw                                   | -                 | 0.339             | 0.278                    | <b>0.015</b>      | <b>0.004</b>                        | 0.405              | 0.772           | 0.884                                | 0.201                             |
|        | UAS-Tau                              | <b>&lt;0.0001</b> | -                 | 0.844                    | 0.125             | <b>0.024</b>                        | 0.104              | 0.552           | 0.490                                | 0.712                             |
|        | UAS-Tau <sup>R406W</sup>             | <b>&lt;0.0001</b> | 0.913             | -                        | 0.155             | <b>0.028</b>                        | 0.066              | 0.416           | 0.369                                | 0.863                             |
|        | UAS-Tau, nmnat+/-                    | <b>&lt;0.0001</b> | 0.841             | 0.757                    | -                 | 0.387                               | <b>0.007</b>       | <b>0.037</b>    | <b>0.041</b>                         | 0.185                             |
|        | UAS-Tau <sup>R406W</sup> , nmnat+/-  | <b>&lt;0.0001</b> | 0.593             | 0.538                    | 0.687             | -                                   | <b>0.001</b>       | <b>0.006</b>    | <b>0.008</b>                         | <b>0.032</b>                      |
|        | UAS-Tau, UAS-NMNAT                   | <b>0.003</b>      | <b>&lt;0.0001</b> | <b>&lt;0.0001</b>        | <b>&lt;0.0001</b> | <b>&lt;0.0001</b>                   | -                  | 0.268           | 0.343                                | <b>0.042</b>                      |
|        | UAS-Tau, UAS-WR                      | <b>0.008</b>      | <b>&lt;0.0001</b> | <b>&lt;0.0001</b>        | <b>&lt;0.0001</b> | <b>&lt;0.0001</b>                   | 0.836              | -               | 0.895                                | 0.314                             |
|        | UAS-Tau <sup>R406W</sup> , UAS-NMNAT | <b>0.009</b>      | <b>&lt;0.0001</b> | <b>&lt;0.0001</b>        | <b>&lt;0.0001</b> | <b>&lt;0.0001</b>                   | 0.660              | 0.819           | -                                    | 0.279                             |
|        | UAS-Tau <sup>R406W</sup> , UAS-WR    | <b>0.014</b>      | <b>&lt;0.0001</b> | <b>0.0002</b>            | <b>&lt;0.0001</b> | <b>&lt;0.0001</b>                   | 0.899              | 0.777           | 0.624                                | -                                 |
|        | Day 20                               |                   |                   |                          |                   |                                     |                    |                 |                                      |                                   |

Day 1

Table S2. Statistical significance of differences in PC6 between genotypes at 2 and 20 DAE.  $n \geq 20$ . Significance level was established by one way ANOVA post-hoc Scheffe test.

| Day 1  |                                               |                   |                   |                          |                             |                                               |                       |                    |                                         |                                      |
|--------|-----------------------------------------------|-------------------|-------------------|--------------------------|-----------------------------|-----------------------------------------------|-----------------------|--------------------|-----------------------------------------|--------------------------------------|
| Day 20 | PC6                                           | <i>yw</i>         | UAS-Tau           | UAS-Tau <sup>R406W</sup> | UAS-Tau,<br><i>nmnat+/-</i> | UAS-Tau <sup>R406W</sup> ,<br><i>nmnat+/-</i> | UAS-Tau,<br>UAS-NMNAT | UAS-Tau,<br>UAS-WR | UAS-Tau <sup>R406W</sup> ,<br>UAS-NMNAT | UAS-Tau <sup>R406W</sup> ,<br>UAS-WR |
|        | <i>yw</i>                                     | -                 | 0.196             | 0.105                    | <b>0.0002</b>               | <b>&lt;0.0001</b>                             | 0.531                 | 0.813              | 0.878                                   | 0.487                                |
|        | UAS-Tau                                       | <b>&lt;0.0001</b> | -                 | 0.628                    | 0.369                       | <b>0.0004</b>                                 | 0.062                 | 0.279              | 0.374                                   | 0.650                                |
|        | UAS-Tau <sup>R406W</sup>                      | <b>&lt;0.0001</b> | 0.953             | -                        | <b>0.009</b>                | <b>0.001</b>                                  | <b>0.039</b>          | 0.146              | 0.224                                   | 0.387                                |
|        | UAS-Tau,<br><i>nmnat+/-</i>                   | <b>&lt;0.0001</b> | 0.574             | 0.452                    | -                           | 0.386                                         | <b>0.0001</b>         | <b>0.0002</b>      | <b>0.001</b>                            | <b>0.001</b>                         |
|        | UAS-Tau <sup>R406W</sup> ,<br><i>nmnat+/-</i> | <b>&lt;0.0001</b> | 0.247             | 0.146                    | 0.416                       | -                                             | <b>&lt;0.0001</b>     | <b>&lt;0.0001</b>  | <b>0.0003</b>                           | <b>0.0002</b>                        |
|        | UAS-Tau,<br>UAS-NMNAT                         | <b>0.003</b>      | <b>&lt;0.0001</b> | <b>&lt;0.0001</b>        | <b>&lt;0.0001</b>           | <b>&lt;0.0001</b>                             | -                     | 0.389              | 0.528                                   | 0.237                                |
|        | UAS-Tau,<br>UAS-WR                            | <b>0.002</b>      | <b>&lt;0.0001</b> | <b>&lt;0.0001</b>        | <b>&lt;0.0001</b>           | <b>&lt;0.0001</b>                             | 0.956                 | -                  | 0.971                                   | 0.614                                |
|        | UAS-Tau <sup>R406W</sup> ,<br>UAS-NMNAT       | <b>0.0002</b>     | <b>&lt;0.0001</b> | <b>&lt;0.0001</b>        | <b>&lt;0.0001</b>           | <b>&lt;0.0001</b>                             | 0.688                 | 0.672              | -                                       | 0.654                                |
|        | UAS-Tau <sup>R406W</sup> ,<br>UAS-WR          | <b>0.0007</b>     | <b>&lt;0.0001</b> | <b>&lt;0.0001</b>        | <b>&lt;0.0001</b>           | <b>&lt;0.0001</b>                             | 0.478                 | 0.468              | 0.756                                   | -                                    |
| Day 20 |                                               |                   |                   |                          |                             |                                               |                       |                    |                                         |                                      |

Day 1

## Supplementary Figure Legends:

**Figure S1. Neuronal overexpression of NMNAT or NMNAT<sup>WR</sup> does not affect cognitive or motor performance.** (A) Learning (PC0) and memory (PC6) were assayed in flies overexpressing either UAS-GFP;UAS-GFP, or UAS-GFP;UAS-NMNAT, or UAS-GFP;UAS-NMNAT<sup>WR</sup> using a pan-neuronal driver. There was no significant difference in the learning or memory index between any genotypes. (B) Climbing performance was measured using negative geotaxis assay in the same flies in (A). There was no significant difference in motor performance between any groups at either DAE2 or DAE20.

**Figure S2. Neuronal overexpression of either NMNAT or NMNAT<sup>WR</sup> with GFP does not cause any morphological changes in the CNS.** Whole-mount adult brains were stained for GFP (green, A,E), NMNAT (red, B, F) and DAPI (blue, C,G). Scale bar = 20µm.

**Figure S3. NMNAT overexpression does not affect the levels and activity of any major kinases that phosphorylate Tau or protein phosphatase 2 (PP2) level.** Cos7 cells were transfected with a vector overexpressing either mCherry or mCherry-*Dm*NMNAT and the lysates were probed for p38 MAPK and activated p38 MAPK (pThr180/pTyr182), ERK and activated ERK (pThr 202/pTyr 204), JNK and activated JNK (pThr 183/Tyr 185), GSK3β and activated GSK3β (pSer9), MARK1 and activated MARK, and PP2.

**Figure S4. pTau<sup>Ser262</sup> is detected in higher Tau oligomers.** Fly brain lysates overexpressing either wild type Tau with GFP, or mutant Tau<sup>R406W</sup> with GFP, NMNAT or NMNAT<sup>WR</sup> were immunoprecipitated with a total human Tau antibody and probed for Tau phosphorylated at Ser262. Overexpression of either NMNAT or NMNAT<sup>WR</sup> caused an increase in the levels of higher Tau oligomers that were probed positively with the pTau<sup>Ser262</sup> antibody.

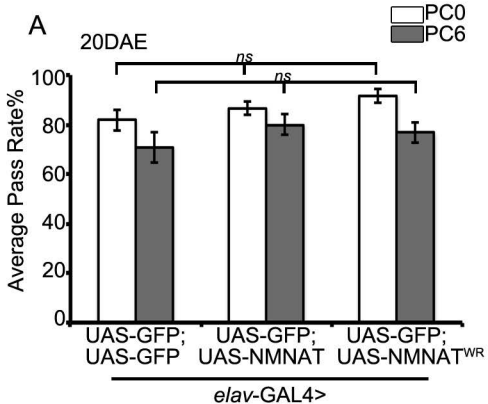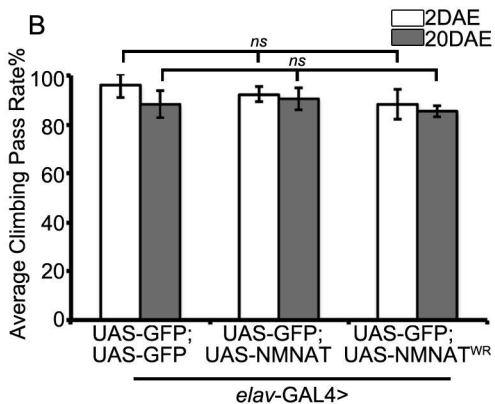

20DAE

GFP

NMNAT

DAPI

Merge

UAS-GFP;  
UAS-NMNAT

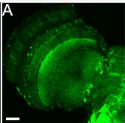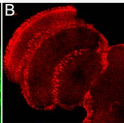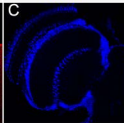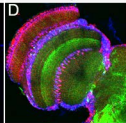

UAS-GFP;  
UAS-NMNAT<sup>TWR</sup>

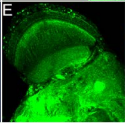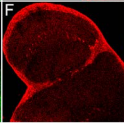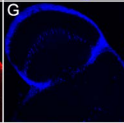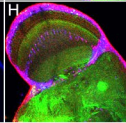

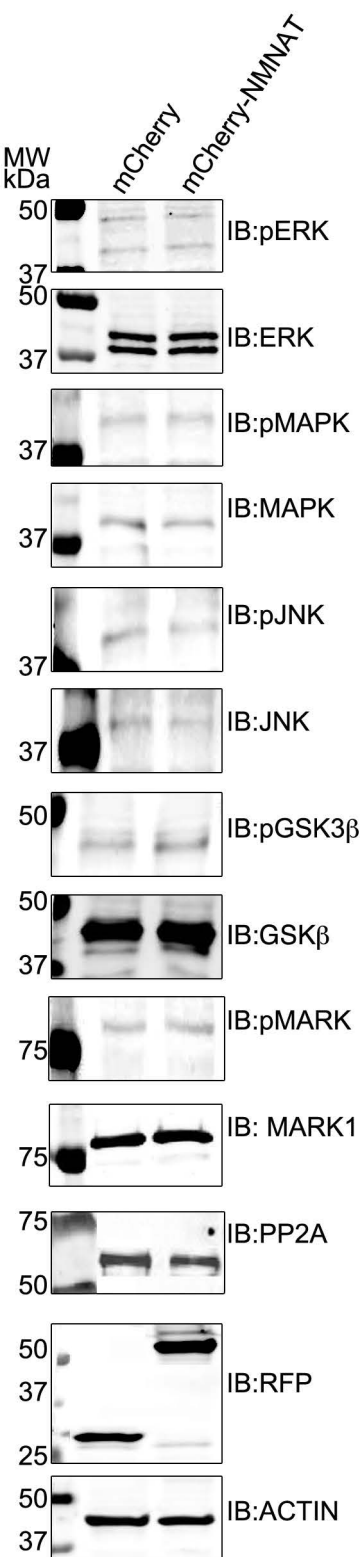

*elav-GAL4*>

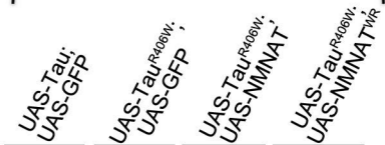

hTau Antibody:

Input IgG + Input IgG + Input IgG + Input IgG +

Stacking  
Gel

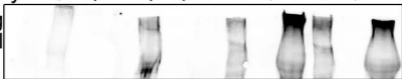

MW  
kDa

250  
150  
100  
75

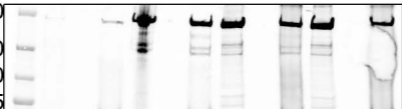

IB: Tau<sup>pSer262</sup>
